# Supplementary material for: Evidence-based design recommendations for prevalence studies on multimorbidity: improving comparability of estimates
Source: Springer Nature journal article supplement (doi:10.1186/s12963-017-0126-4), 2017-03-07
Supplement: MOESM1 [file 12126988]

Additional file 1. Studies included in the analyses (N=45) with complete reference information for studies listed in the table.

| No. of study | Name (Year)          | STROBE Criteria* (total score) | Study Population                                                    | Setting               | Data source                  | Data collection period | No. of patients in study | Age group | Mean age | No. of patients per agegroup | No. of diseases in the classif. | Disease classification |
|--------------|----------------------|--------------------------------|---------------------------------------------------------------------|-----------------------|------------------------------|------------------------|--------------------------|-----------|----------|------------------------------|---------------------------------|------------------------|
| 1            | Alonso et al 2004    | 21                             | General Social Surveys, United States, 1989-90                      | General population    | Self report                  | Period prevalence      | 2474                     | ≥18       | 43.6     | 2474                         | 11 Morbidities                  |                        |
|              |                      |                                | Central Person Registry data, Denmark, 1994                         | General population    | Self report                  | Point prevalence       | 4084                     | ≥16       | 43.9     | 4084                         |                                 |                        |
|              |                      |                                | Sofres METASCOPE database, France, 1995                             | General population    | Self report                  | Point prevalence       | 3656                     | ≥15       | 44.6     | 3656                         |                                 |                        |
|              |                      |                                | Infratest National database, Germany, 1994                          | General population    | Self report                  | Point prevalence       | 2914                     | ≥14       | 45.2     | 2914                         |                                 |                        |
|              |                      |                                | National sample lists, Italy, 1995                                  | General population    | Self report                  | Point prevalence       | 2031                     | ≥18       | 46.0     | 2031                         |                                 |                        |
|              |                      |                                | National and Amsterdam registry, The Netherlands, 1994 & 1996       | General population    | Self report                  | Period prevalence      | 4059                     | ≥12       | 43.4     | 4059                         |                                 |                        |
|              |                      |                                | Office of the National Registrar, Norway, 1996                      | General population    | Self report                  | Point prevalence       | 2323                     | 19-80     | 44.9     | 2323                         |                                 |                        |
| 2            | Aarts et al 2011     | 21                             | Postal survey Limburg, The Netherlands, 2008                        | General population    | Self report                  | Point prevalence       | 15188                    | 55-90     | 67.7     | 15188                        | 22 Morbidities                  |                        |
| 3            | Britt et al 2008     | 18                             | General Practice Substudy of Beach program, Australia, 2005         | Primary care practice | Self report & medical record | Point prevalence       | 9111                     | <25       | 12.8     | 2047                         | 17 Morbidities                  |                        |
|              |                      |                                |                                                                     |                       |                              |                        |                          | 25-44     | 35.2     | 2281                         |                                 |                        |
|              |                      |                                |                                                                     |                       |                              |                        |                          | 45-64     | 54.1     | 2450                         |                                 |                        |
|              |                      |                                |                                                                     |                       |                              |                        |                          | 65-74     | 69.7     | 990                          |                                 |                        |
|              |                      |                                |                                                                     |                       |                              |                        |                          | ≥75       | 81.8     | 1343                         |                                 |                        |
| 4            | Caughey et al 2010   | 19                             | Longitudinal study of ageing, Australia, 1992 - 06                  | General population    | Self report                  | Period prevalence      | 2088                     | 65-69     | 67.4     | 136                          | 17 Morbidities                  |                        |
|              |                      |                                |                                                                     |                       |                              |                        |                          | 70-74     | 72.4     | 558                          |                                 |                        |
|              |                      |                                |                                                                     |                       |                              |                        |                          | 75-79     | 77.4     | 522                          |                                 |                        |
|              |                      |                                |                                                                     |                       |                              |                        |                          | 80-84     | 82.3     | 436                          |                                 |                        |
|              |                      |                                |                                                                     |                       |                              |                        |                          | >85       | 89.0     | 435                          |                                 |                        |
| 5            | Cesari et al 2006    | 21                             | Population based iSIRENTE study, Italy, 2003                        | General population    | Self report & medical record | Point prevalence       | 364                      | ≥80       | 85.9     | 364                          | 14 Morbidities                  |                        |
| 6            | Chan et al 2002      | 14                             | Hospital admissions Randwick Area, Australia, 1998-99               | Hospital/nursing home | Self report & medical record | Period prevalence      | 526                      | 55-95     | 68.5     | 526                          | 10 Morbidities                  |                        |
| 7            | Fortin et al 2005    | 20                             | Patients recruited from Quebec, Canada, 2003                        | Primary care practice | Medical record               | Point prevalence       | 980                      | 18-44     | 32.2     | 231                          | ~300 ICPC-2                     |                        |
|              |                      |                                |                                                                     |                       |                              |                        |                          | 45-64     | 53.7     | 429                          |                                 |                        |
|              |                      |                                |                                                                     |                       |                              |                        |                          | ≥65       | 75.3     | 320                          |                                 |                        |
| 8            | Fortin et al 2010    | 20                             | Canadian Health Survey, Canada, 2005                                | General population    | Self report                  | Point prevalence       | 26000                    | 25-44     | 35.6     | 11186                        | 7 Morbidities                   |                        |
|              |                      |                                |                                                                     |                       |                              |                        |                          | 45-64     | 53.9     | 9870                         |                                 |                        |
|              |                      |                                |                                                                     |                       |                              |                        |                          | 65-79     | 71.9     | 3647                         |                                 |                        |
|              |                      |                                |                                                                     |                       |                              |                        |                          | 80+       | 85.3     | 1296                         |                                 |                        |
| 9            | Fuchs et al 1998     | 21                             | National Population Register (NPR) and CALAS Study, Israel, 1998-92 | General population    | Self report                  | Period prevalence      | 1487                     | 75-94     | 80.9     | 1487                         | 14 Morbidities                  |                        |
| 10           | Fung et al 2008      | 19                             | Telephone survey CQI Study, United States, 2001/02                  | General population    | Self report                  | Period prevalence      | 15709                    | 18-97     | 45.8     | 15709                        | 16 Morbidities                  |                        |
| 11           | Galenkamp et al 2011 | 21                             | LASA population-based Study, The Netherlands, 2005/06               | General population    | Self report                  | Period prevalence      | 2046                     | 57-98     | 69.2     | 2046                         | 9 Morbidities                   |                        |
| 12           | Gunn et al 2010      | 20                             | Diamond Longitudinal Study, various GPs, Australia, 2005            | Primary care practice | Self report                  | Point prevalence       | 6864                     | 18-44     | 31.8     | 2453                         | 12 Morbidities                  |                        |
|              |                      |                                |                                                                     |                       |                              |                        |                          | 45-64     | 54.1     | 3142                         |                                 |                        |
|              |                      |                                |                                                                     |                       |                              |                        |                          | ≥65       | 75.4     | 1200                         |                                 |                        |
| 13           | Glynn et al 2011     | 20                             | 3 primary care practices West Ireland, Ireland, 2008/09             | Primary care practice | Medical record               | Period prevalence      | 3309                     | 50-59     | 54.8     | 1309                         | 147 ICPC-2                      |                        |
|              |                      |                                |                                                                     |                       |                              |                        |                          | 60-69     | 64.5     | 975                          |                                 |                        |
|              |                      |                                |                                                                     |                       |                              |                        |                          | 70-79     | 74.6     | 628                          |                                 |                        |
|              |                      |                                |                                                                     |                       |                              |                        |                          | ≥80       | 85.4     | 397                          |                                 |                        |

|    |                       |    |                                                                                  |                       |                              |                   |         |       |      |         |                |
|----|-----------------------|----|----------------------------------------------------------------------------------|-----------------------|------------------------------|-------------------|---------|-------|------|---------|----------------|
| 14 | Hoffman et al 1996    | 18 | National Medical Expenditure Survey, United States, 1987                         | General population    | Self report                  | Point prevalence  | 27505   | 0-17  | 9.0  | 7178    | ~1000 ICD-9    |
|    |                       |    |                                                                                  |                       |                              |                   |         | 18-44 | 30.9 | 11889   |                |
|    |                       |    |                                                                                  |                       |                              |                   |         | 45-64 | 54.8 | 5103    |                |
|    |                       |    |                                                                                  |                       |                              |                   |         | ≥65   | 74.5 | 3335    |                |
| 15 | Hudon 2008            | 20 | Quebec Health Survey, Netherlands, 1998, Canada                                  | General population    | Self report                  | Point prevalence  | 16782   | 18-69 | 41.2 | 16782   | 25 Morbidities |
| 16 | Hung et al 2011       | 20 | Health and Retirement Study, United States, 2008                                 | General population    | Self report                  | Point prevalence  | 11321   | 65-69 | 67.4 | 3128    | 7 Morbidities  |
|    |                       |    |                                                                                  |                       |                              |                   |         | 70-74 | 72.4 | 2908    |                |
|    |                       |    |                                                                                  |                       |                              |                   |         | 75-79 | 77.4 | 2180    |                |
|    |                       |    |                                                                                  |                       |                              |                   |         | 80-84 | 82.4 | 1517    |                |
|    |                       |    |                                                                                  |                       |                              |                   |         | ≥85   | 89.2 | 1588    |                |
| 17 | Jansa et al 2010      | 20 | Hospital inpatients Barcelona, Spain, 2004                                       | Hospital/nursing home | Self report & medical record | Point prevalence  | 301     | 23-93 | 49.1 | 301     | 40 ICD-9       |
| 18 | Laux et al 2008       | 16 | 24 GPs in Germany using Content Database, Germany, 2006                          | Primary care practice | Medical record               | Point prevalence  | 39699   | ≤50   | 28.5 | 18815   | 147 ICPC-2     |
| 19 | Lee et al 2008        | 17 | Veteran Health care, United States, 1999-00                                      | Health insurance      | Administrative data          | Period prevalence | 741847  | 55-64 | 59.6 | 741847  | 11 ICD-9       |
| 20 | Loza et al 2009       | 20 | EPISER Health survey, Spain, 1999/00                                             | General population    | Self report                  | Period prevalence | 2192    | ≥20   | 47.5 | 2192    | 9 Morbidities  |
| 21 | Macleod et al 2004    | 13 | Cairns practice registry, United Kingdom, 2000                                   | Primary care practice | Medical record               | Point prevalence  | 7286    | ≥18   | 47.7 | 7286    | 17 Morbidities |
| 22 | Marengoni et al 2008  | 14 | Population based Kungsholmen Project, Sweden, 1987- 2000                         | General population    | Medical record               | Period prevalence | 1099    | 77-84 | 80.6 | 306     | 30 ICD-9       |
|    |                       |    |                                                                                  |                       |                              |                   |         | ≥85   | 88.8 | 296     |                |
| 23 | Menotti et al 2001    | 15 | FINE Study, Finland, 1984-94                                                     | General population    | Self report & medical record | Period prevalence | 2285    | 65-84 | 72.6 | 716     | 7 Morbidities  |
|    |                       |    | FINE Study, The Netherlands, 1985-95                                             | General population    | Self report & medical record | Period prevalence |         | 65-84 | 72.6 | 887     |                |
|    |                       |    | FINE Study, Italy, 1985-95                                                       | General population    | Self report & medical record | Period prevalence |         | 65-84 | 72.8 | 682     |                |
| 24 | Min et al 2007        | 19 | ACOVE Study (Managed Care), United States, 1998-99                               | Health insurance      | Medical record               | Period prevalence | 372     | ≥65   | 75.3 | 372     | 8 Morbidities  |
| 25 | Minas et al 2010      | 19 | Various primary health care centers, Central Greece, 2008                        | Primary care practice | Self report & medical record | Point prevalence  | 20299   | 14-64 | 50.0 | 8423    | ~300 ICPC-2    |
| 26 | Murtaugh et al 2009   | 16 | OASIS (MediCare, MediCaid), United States, 2004 & 2005                           | Health insurance      | Administrative data          | Period prevalence | 5585931 | ≥65   | 75.6 | 5585931 | 18 ICD-9       |
| 27 | Naessens et al 2011   | 14 | Various administrative data, United States, 2004 - 07                            | Health insurance      | Administrative data          | Period prevalence | 33324   | 18-34 | 26.4 | 9170    | 56 ICD-9       |
|    |                       |    |                                                                                  |                       |                              |                   |         | 35-49 | 42.6 | 14607   |                |
|    |                       |    |                                                                                  |                       |                              |                   |         | 50-64 | 56.7 | 9547    |                |
| 28 | Nagel et al 2008      | 20 | EPIC-Heidelberg cohort, Germany, 1994-98                                         | General population    | Self report & medical record | Period prevalence |         | 50-74 | 61.4 | 13781   | 15 Morbidities |
| 29 | Nägga et al 2012      | 20 | Health survey Linköping, Sweden, 2007/08                                         | General population    | Self report & medical record | Period prevalence | 496     | 85    | 85.9 | 496     | 14 ICD-10      |
| 30 | Naughton et al 2006   | 17 | Pharmacy Database, Ireland, 2004                                                 | Health insurance      | Administrative data          | Point prevalence  | 316928  | ≥70   | 78.2 | 316928  | 9 Morbidities  |
| 31 | Newacheck et al 1991  | 16 | National health interview survey on child health, United States, 1988            | General population    | Self report                  | Point prevalence  | 7465    | 10-17 | 14.1 | 7465    | 19 Morbidities |
| 32 | Rapoport et al 2004   | 13 | National Population Health Survey, Canada, 1998-99                               | General population    | Self report                  | Period prevalence | 13682   | 20-39 | 30.6 | 5308    | 24 Morbidities |
|    |                       |    |                                                                                  |                       |                              |                   |         | 40-59 | 48.8 | 4720    |                |
|    |                       |    |                                                                                  |                       |                              |                   |         | 60-79 | 69.0 | 2995    |                |
|    |                       |    |                                                                                  |                       |                              |                   |         | ≥80   | 85.3 | 659     |                |
| 33 | Salisbury et al 2011  | 18 | UK General Practice Research Database, United Kingdom, 2005 - 08                 | Primary care practice | Medical record               | Period prevalence | 99997   | ≥18   | 48.0 | 99997   | 17 Morbidities |
| 34 | Schellevis et al 1993 | 16 | Different GP practices, The Netherlands, 1988                                    | Primary care practice | Medical record               | Point prevalence  | 23534   | <65   | 30.8 | 21349   | 5 Morbidities  |
| 35 | Schneider et al 2009  | 17 | CCW MediCare, United States, 2005                                                | Health insurance      | Administrative data          | Point prevalence  | 1649574 | ≥0    | 36.9 | 1649574 | 6 Morbidities  |
| 36 | Schram et al 2008     | 17 | Leiden 85-plus population-based Study, The Netherlands, 1997                     | General population    | Self report & medical record | Point prevalence  | 599     | ≥85   | 88.9 | 599     | 12 Morbidities |
|    |                       |    | Rotterdam population-based Study, The Netherlands, 2002                          | General population    | Self report & medical record | Point prevalence  | 3550    | 65-99 | 75.0 | 3550    | 14 Morbidities |
|    |                       |    | January 1, 2005 10 years of registration time CMR, GP registries in Nijmegen, NL | Primary care practice | Self report & medical record | Point prevalence  | 2895    | ≥55   | 68.0 | 2895    | 72 Morbidities |
|    |                       |    | RNUGP, GP registries Leiden region, The Netherlands, 2006                        | Primary care practice | Self report & medical record | Point prevalence  | 5610    | ≥55   | 68.0 | 5610    | 83 Morbidities |
|    |                       |    | LMR Hospital register, The Netherlands, 2003-04                                  | Hospital/nursing home | Medical record               | Point prevalence  | 1058234 | ≥55   | 68.0 | 1058234 | 185 ICD-9      |
|    |                       |    | RAI Nursing home, The Netherlands, 2005                                          | Hospital/nursing home | Medical record               | Point prevalence  | 1274    | ≥55   | 68.0 | 1274    | 26 Morbidities |

|    |                          |    |                                                                    |                       |                              |                   |         |       |      |         |                 |
|----|--------------------------|----|--------------------------------------------------------------------|-----------------------|------------------------------|-------------------|---------|-------|------|---------|-----------------|
| 37 | Taylor et al 2010        | 19 | North West Adelaide Health Study, South Australia, 2004- 06        | General population    | Self report & medical record | Period prevalence | 3203    | 20-39 | 30.1 | 1226    | 7 Morbidities   |
|    |                          |    |                                                                    |                       |                              |                   |         | 40-59 | 49.5 | 1171    |                 |
|    |                          |    |                                                                    |                       |                              |                   |         | 60-90 | 72.0 | 808     |                 |
| 38 | Tucker-Seeley et al 2011 | 21 | Population based Health and Retirement Study, United States, 2004  | General population    | Self report                  | Point prevalence  | 7305    | 50-59 | 54.7 | 2004    | 6 Morbidities   |
|    |                          |    |                                                                    |                       |                              |                   |         | 60-69 | 64.6 | 3218    |                 |
|    |                          |    |                                                                    |                       |                              |                   |         | ≥70   | 78.8 | 2083    |                 |
| 39 | Uijen et al 2008         | 15 | CMR Nijmegen, The Netherlands, 2005                                | Primary care practice | Medical record               | Point prevalence  | 13584   | 45-64 | 54.3 | 8764    | -300 ICPC-2     |
|    |                          |    |                                                                    |                       |                              |                   |         | 65-74 | 69.7 | 3067    |                 |
|    |                          |    |                                                                    |                       |                              |                   |         | >75   | 81.7 | 1753    |                 |
| 40 | v.d.Akker et al 1998     | 17 | Registration Network Family Practices (RNH), The Netherlands, 1994 | Primary care practice | Medical record               | Point prevalence  | 60857   | <20   | 9.9  | 13717   | -300 ICPC-2     |
|    |                          |    |                                                                    |                       |                              |                   |         | 20-39 | 30.0 | 19121   |                 |
|    |                          |    |                                                                    |                       |                              |                   |         | 40-59 | 49.0 | 16064   |                 |
|    |                          |    |                                                                    |                       |                              |                   |         | 60-79 | 68.8 | 10335   |                 |
|    |                          |    |                                                                    |                       |                              |                   |         | ≥80   | 85.1 | 1620    |                 |
| 41 | v.d.Bussche et al 2011   | 21 | GEK claims data, Germany, 2004                                     | Health insurance      | Administrative data          | Point prevalence  | 123224  | ≥65   | 74.7 | 123224  | 46 ICD-10       |
| 42 | Walker et al 2007        | 17 | National Health Survey 2001, Australia, 2001                       | General population    | Self report                  | Point prevalence  | 17450   | 20-39 | 30.3 | 6664    | 8 Morbidities   |
|    |                          |    |                                                                    |                       |                              |                   |         | 40-59 | 49.2 | 6427    |                 |
|    |                          |    |                                                                    |                       |                              |                   |         | 60-74 | 67.0 | 2887    |                 |
|    |                          |    |                                                                    |                       |                              |                   |         | >75   | 81.5 | 1472    |                 |
| 43 | Wang et al 2008          | 21 | Different GP practices, Germany, 2002                              | Primary care practice | Self report & medical record | Point prevalence  | 1009    | 15-89 | 46.9 | 1009    | 13 Morbidities  |
| 44 | Wolff et al 2002         | 19 | Medicare Part A and B, United States, 1999                         | Health insurance      | Administrative data          | Point prevalence  | 1217103 | 65-69 | 67.5 | 442583  | 23 MDC**        |
| 45 | Wong et al 2011          | 21 | Dutch Hospital Register (LMR) 2004, The Netherlands, 1995 - 04     | Hospital/nursing home | Medical record               | Period prevalence | 1414142 | ≥0    | 38.1 | 1414142 | 138 Morbidities |

\* Based on Strengthening the Reporting of Observational studies in Epidemiology (STROBE), checklist for reporting of observational studies

\*\* MDC: Major Diagnostic Category; ICD-9, ICD-10: International Classification of Diseases; ICPC-2: International Classification of Primary Care
